# Supplementary material
Source: PubMed Central journal article supplement (PMC3650530)
Supplement: JB.02150-12_zjb999092585so1.pdf [file JB.02150-12_zjb999092585so1.pdf]

## Supplemental Material

### Supplemental Materials and Methods

Circular dichroism spectroscopy:

CD spectra of wild type PelA (PelA<sub>Δ46</sub>) and the D528A, H600A and H604A mutants were measured using a Jasco J-810 spectrometer (Jasco Spectroscopic Company, Japan). Experiments were performed at room temperature using a quartz glass cell with a 1 mm path length. The samples were recorded from 300 – 190 nm wavelengths with a total of three scans for each. The molar ellipticity was calculated based on the concentrations of protein used, which was verified using the Peirce<sup>®</sup> BCA Protein Assay Kit from ThermoScientific.

### Supplemental Figure legends

**Supplemental Figure 1. SDS-PAGE and CD analysis of wild type PelA and the four PelA point mutants (D528A, D530A, H600A and H604A).** (A) A 14 % SDS gel was used. Lane 1, molecular weight marker in kDa; Lane 2, wild type PelA (PelA<sub>Δ46</sub>) protein; Lane 3, PelA<sub>Δ46</sub> D528A mutant; Lane 4, PelA<sub>Δ46</sub> D530A mutant; Lane 5, PelA<sub>Δ46</sub> H600A mutant; Lane 6 PelA<sub>Δ46</sub> H604A mutant. Each protein was concentrated to 0.5 mg ml<sup>-1</sup> and mixed 1:1 with 2X loading buffer. All proteins samples were >99% pure and the molecular weight estimated to be ~102 kDa. Proteins were purified as described in the Methods section. (B) The CD spectra for the mutants were comparable to that of the wild type. The concentration of each protein used to calculate the molar ellipticity was verified using the Peirce<sup>®</sup> BCA Protein Assay Kit from ThermoScientific.

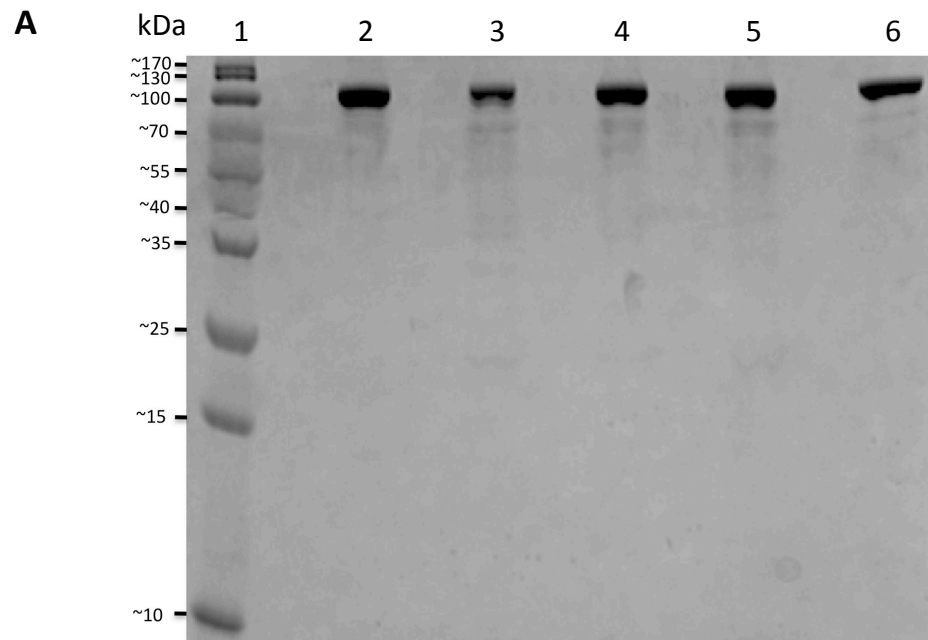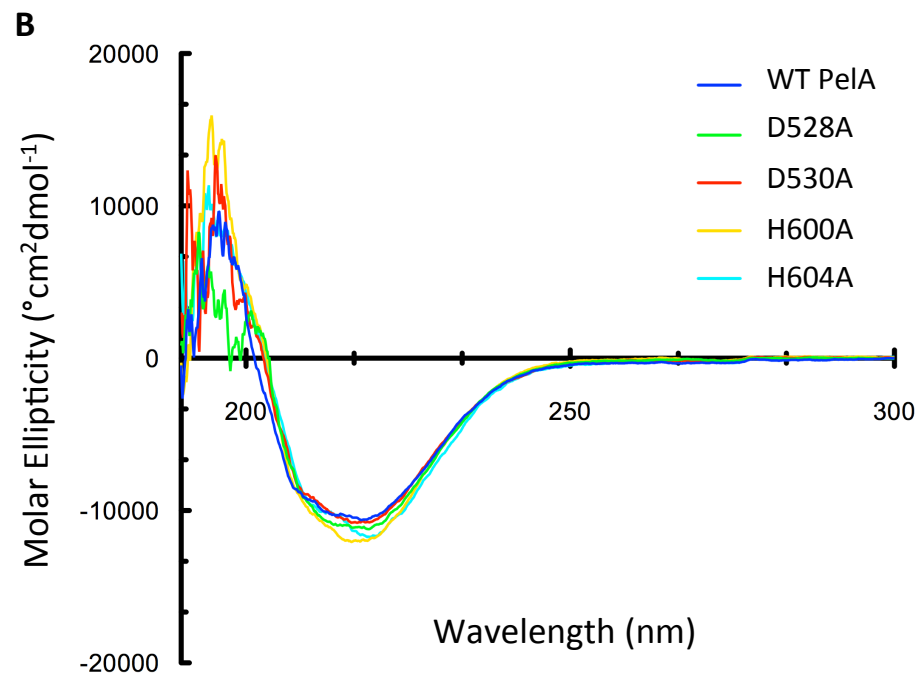

**Table 1. Bacterial strains, primers and plasmids****Deletion Construct primers**

|                           |                                 |
|---------------------------|---------------------------------|
| PelA upstream-F HindIII   | TTTAAGCTTGCTGCGGGCGACAAATGTCC   |
| PelA upstream-R           | GCAACTCGAAGGTCTTACGGCAGGACGGCAG |
| PelA downstream-F         | CCGTAACACCTTCGAGTTGCCGATGGAGCAG |
| PelA downstream-R HindIII | TTTAAGCTTCCAGTTCGGCAAAGGTCCGCG  |

**Chromosomal PelA Point Mutation Primers**

|                            |                                 |
|----------------------------|---------------------------------|
| PelA upstream-F2-HindIII   | TTTAAGCTTCGAGGGCGACCTGACCCTGAG  |
| PelA downstream-R2-HindIII | TTTAAGCTTGCCTGCATCGCCGCTAGATCTG |
| PelA D528A F               | CCGTGCACATCGCTGGCGACGGCTTC      |
| PelA D528A R               | GAAGCCGTGCCAGCGATGTGCACGG       |
| PelA D530A F               | CACATCGATGGCGCCGGCTTCGTCTC      |
| PelA D530A R               | GAGACGAAGCCGGCGCCATCGATGTG      |
| PelA H600A F               | GGTCGCCAGCGCTACCTTCAGCCATC      |
| PelA H600A R               | GATGGCTGAAGGTAGCGCTGGCGACC      |
| PelA H604A F               | CCATACCTTCAGCGCTCCGTTCTTCTGGC   |
| PelA H604A R               | GCCAGAAGAACGGAGCGCTGAAGGTATGG   |

**Recombinant vector construct primers**

|                       |                                |
|-----------------------|--------------------------------|
| PelA <sub>Δ46</sub> F | CTGCATATGGGCGGGCCGTCCAGCGTGGCG |
| PelA <sub>Δ46</sub> R | GAGCTCGAGTCAGCGGCAGACGAGTTGGCC |

**PelA Point mutant primers used to generate recombinant proteins**

|                             |                                   |
|-----------------------------|-----------------------------------|
| PelA <sub>Δ46</sub> D528A F | ACCGTGCACATCGCTGGCGACGGCTTC       |
| PelA <sub>Δ46</sub> D528A R | GAAGCCGTGCCAGCGATGTGCACGGT        |
| PelA <sub>Δ46</sub> D530A F | GTGCACATCGATGGCGCCGGCTTCGTCTCCCGT |
| PelA <sub>Δ46</sub> D530A R | ACGGGAGACGAAGCCGGCGCCATCGATGTGCAC |
| PelA <sub>Δ46</sub> H600A F | GTCGAGGTGCCAGCGCTACCTTCAGCCATCCG  |
| PelA <sub>Δ46</sub> H600A R | CGGATGGCTGAAGGTAGCGCTGGCGACCTCGAC |
| PelA <sub>Δ46</sub> H604A F | AGCCATACCTTCAGCGCTCCGTTCTTCTGGCAG |
| PelA <sub>Δ46</sub> H604A R | CTGCCAGAAGAACGGAGCGCTGAAGGTATGGCT |

**Strains**

| Strains                                     |                                                                                                                                              | Reference            |
|---------------------------------------------|----------------------------------------------------------------------------------------------------------------------------------------------|----------------------|
| PAO1                                        | Wild-type                                                                                                                                    | Rahme et al., 1995   |
| PAO1Δ <i>wspF</i>                           | <i>wspF</i> ; non-polar mutation                                                                                                             | Hickman et al., 2005 |
| PAO1Δ <i>wspF</i> Δ <i>pel</i>              | <i>wspF</i> ; non-polar mutation, <i>pelA</i> ; polar mutant of the <i>pel</i> operon                                                        | Irie et al., 2010    |
| PAO1Δ <i>wspF</i> Δ <i>psl</i>              | <i>wspF</i> ; non-polar mutation, <i>pslBCD</i> ; polar mutant of the <i>psl</i> operon                                                      | Irie et al., 2010    |
| PAO1Δ <i>wspF</i> Δ <i>psl</i> Δ <i>pel</i> | <i>wspF</i> ; non-polar mutation, <i>pelA</i> ; polar mutant of the <i>pel</i> operon, <i>pslBCD</i> ; polar mutant of the <i>psl</i> operon | Borlee et al. 2010   |

|                                                                             |                                                                                                                                                                                  |                                      |
|-----------------------------------------------------------------------------|----------------------------------------------------------------------------------------------------------------------------------------------------------------------------------|--------------------------------------|
| PAO1 $\Delta$ wspF $\Delta$ psl P <sub>BAD</sub> pel                        | wspF; non-polar mutation, pslBCD; polar mutant of the psl operon, arabinose-inducible pel operon                                                                                 | This study                           |
| PAO1 $\Delta$ wspF $\Delta$ psl P <sub>BAD</sub> pel::peIA <sub>D528A</sub> | peIA <sub>D528A</sub>                                                                                                                                                            | This study                           |
| PA14                                                                        | wild-type                                                                                                                                                                        | Rahme <i>et al.</i> , 1995           |
| PA14 $\Delta$ peIA                                                          | peIA nonpolar mutant of the pel operon                                                                                                                                           | This study                           |
| PA14::peIA <sub>D528A</sub>                                                 | peIA <sub>D528A</sub>                                                                                                                                                            | This study                           |
| PA14::peIA <sub>D530A</sub>                                                 | peIA <sub>D530A</sub>                                                                                                                                                            | This study                           |
| PA14::peIA <sub>H604A</sub>                                                 | peIA <sub>H600A</sub>                                                                                                                                                            | This study                           |
| PA14::peIA <sub>H600A</sub>                                                 | peIA <sub>H604A</sub>                                                                                                                                                            | This study                           |
| PA14 P <sub>BAD</sub> pel                                                   | arabinose-inducible pel operon<br>F <sup>-</sup> ompT hsdS(r <sub>B</sub> <sup>-</sup> m <sub>B</sub> <sup>-</sup> ) dcm <sup>+</sup> Tet <sup>r</sup> gal I(DE3) endA Hte [argU | Colvin <i>et al.</i> 2011<br>Novagen |
| <i>E. coli</i> BL21-CodonPlus(DE3)-RP                                       | proL Cam <sup>r</sup> ]                                                                                                                                                          |                                      |
| <b>Plasmids</b>                                                             |                                                                                                                                                                                  |                                      |
| pEX18Gm                                                                     | Suicide cloning vector, gentamicin resistance                                                                                                                                    | Hoang <i>et al.</i> , 1998           |
| pEX18Gm:: $\Delta$ peIA                                                     | peIA replacement vector                                                                                                                                                          | This study                           |
| pEX18Gm:: $\Delta$ peIA2                                                    | peIA replacement vector for SD mutagenesis                                                                                                                                       | This study                           |
| pEX18Gm:: $\Delta$ peIA <sub>D528A</sub>                                    | Site-directed peIA <sub>D528A</sub> replacement vector                                                                                                                           | This study                           |
| pEX18Gm:: $\Delta$ peIA <sub>D530A</sub>                                    | Site-directed peIA <sub>D530A</sub> replacement vector                                                                                                                           | This study                           |
| pEX18Gm:: $\Delta$ peIA <sub>H600A</sub>                                    | Site-directed peIA <sub>H600A</sub> replacement vector                                                                                                                           | This study                           |
| pEX18Gm:: $\Delta$ peIA <sub>H604A</sub>                                    | Site-directed peIA <sub>H604A</sub> replacement vector                                                                                                                           | This study                           |
| pJN105                                                                      | araC-PBAD cassette cloned in pBBR1MCS-5, gentamicin resistance                                                                                                                   | Newman & Fuqua, 1999                 |
| pJN1120                                                                     | PA1120 cloned into pJN105                                                                                                                                                        | Borlee <i>et al.</i> 2010            |
| pPSV18                                                                      | shuttle vector with pBR322 origin, bla                                                                                                                                           | Rietsch <i>et al.</i> , 2004         |
| pNApeIA <sub><math>\Delta</math>46</sub>                                    | pET28a based peIA expression vector                                                                                                                                              | This study                           |
| pNApeIA <sub><math>\Delta</math>46 D528A</sub>                              | Site-directed peIA <sub>D528A</sub> expression vector                                                                                                                            | This study                           |
| pNApeIA <sub><math>\Delta</math>46 D530A</sub>                              | Site-directed peIA <sub>D530A</sub> expression vector                                                                                                                            | This study                           |
| pNApeIA <sub><math>\Delta</math>46 H600A</sub>                              | Site-directed peIA <sub>H600A</sub> expression vector                                                                                                                            | This study                           |
| pNApeIA <sub><math>\Delta</math>46 H604A</sub>                              | Site-directed peIA <sub>H604A</sub> expression vector                                                                                                                            | This study                           |
| <b>Expression vector</b>                                                    |                                                                                                                                                                                  |                                      |
| pET-28a                                                                     | T7 expression system inducible with IPTG                                                                                                                                         | Novagen                              |
